# Supplementary material for: CHK1 plays a critical role in the anti-leukemic activity of the wee1 inhibitor MK-1775 in acute myeloid leukemia cells
Source: Springer Nature journal article supplement (doi:10.1186/s13045-014-0053-9), 2014-07-31
Supplement: MOESM2 [file 9777256]

Table S1. Cell cycle distribution of CTS and U937 cells after 500 nM MK-1775 treatment

|             |               | <b>0 h</b>   | <b>4 h</b>   | <b>8 h</b>   | <b>12 h</b>  | <b>24 h</b>  | <b>36 h</b>  | <b>48 h</b>  |
|-------------|---------------|--------------|--------------|--------------|--------------|--------------|--------------|--------------|
| <b>CTS</b>  | <b>Sub-G1</b> | 4.92 ± 0.34  | 7.07 ± 0.06  | 19.03 ± 0.33 | 21.9 ± 0.15  | 51.00 ± 0.21 | 71.53 ± 0.35 | 84.73 ± 0.13 |
|             | <b>G1</b>     | 63.73 ± 0.03 | 58.00 ± 0.61 | 57.6 ± 0.17  | 52.63 ± 0.29 | 30.43 ± 0.18 | 17.23 ± 0.23 | 9.47 ± 0.27  |
|             | <b>S</b>      | 22.07 ± 0.07 | 25.97 ± 0.38 | 20.80 ± 0.25 | 23.87 ± 0.23 | 17.93 ± 0.18 | 10.87 ± 0.17 | 5.55 ± 0.18  |
|             | <b>G2/M</b>   | 9.32 ± 0.29  | 8.95 ± 0.28  | 2.58 ± 0.14  | 1.62 ± 0.01  | 0.67 ± 0.02  | 0.42 ± 0.04  | 0.25 ± 0.02  |
| <b>U937</b> | <b>Sub-G1</b> | 5.32 ± 0.31  | 5.05 ± 0.04  | 27.97 ± 0.29 | 30.8 ± 0.25  | 30.77 ± 0.72 | 38.17 ± 0.07 | 44.43 ± 0.26 |
|             | <b>G1</b>     | 65.63 ± 0.26 | 62.63 ± 0.35 | 50.77 ± 0.38 | 46.6 ± 0.15  | 35.83 ± 1.05 | 33.33 ± 0.73 | 33.4 ± 0.32  |
|             | <b>S</b>      | 19.70 ± 0.69 | 22.63 ± 0.22 | 16.7 ± 0.27  | 18.83 ± 0.29 | 28.2 ± 1.29  | 25.5 ± 0.60  | 19.43 ± 0.18 |
|             | <b>G2/M</b>   | 9.01 ± 0.13  | 9.67 ± 0.22  | 4.56 ± 0.27  | 3.76 ± 0.12  | 5.19 ± 0.43  | 2.97 ± 0.24  | 2.74 ± 0.16  |

The data are presented as means of triplicates ± standard errors from one representative experiment.
